# Supplementary material for: Fabrication of a novel core–shell–shell temperature-sensitive magnetic composite with excellent performance for papain adsorption
Source: Royal Society of Chemistry journal article supplement (doi:10.1039/d1ra04128b), 2021-01-01
Supplement: d1ra04128b1.pdf [file d1ra04128b1.pdf]

Supporting information for

## **Fabrication of a novel core-shell-shell magnetic composite with excellent performance for papain adsorption**

Pengfei Chen <sup>\*a</sup>, Shun Yao <sup>\*b</sup>, Dongmei Zheng <sup>a</sup>, Zhiyuan Xu <sup>a</sup>, Jinling Yu <sup>a</sup> and Tingting Liang <sup>a</sup>

<sup>a</sup> School of Food and Bioengineering, Xihua University, Chengdu 610039, People's Republic of China.

E-mail address: pengfeimj1028@163.com

Tel/Fax: +86-28-8772-0552

<sup>b</sup> School of Chemical Engineering, Sichuan University, Chengdu 610065, People's Republic of China.

E-mail address: cusack@scu.edu.cn

Tel/Fax: +86-28-8540-5221

\*Corresponding author

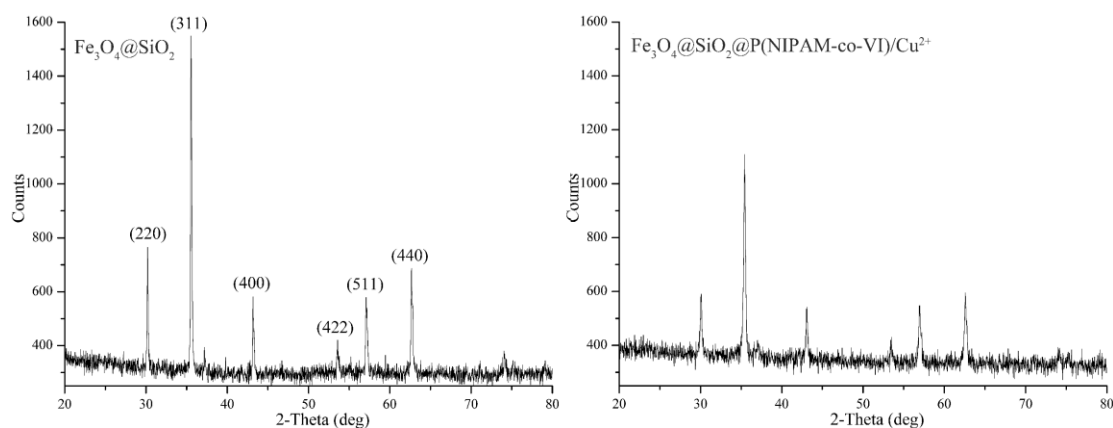

Fig. S1 PXRD spectrum of  $\text{Fe}_3\text{O}_4@\text{SiO}_2$  and  $\text{Fe}_3\text{O}_4@\text{SiO}_2@\text{P(NIPAM-co-VI)}/\text{Cu}^{2+}$

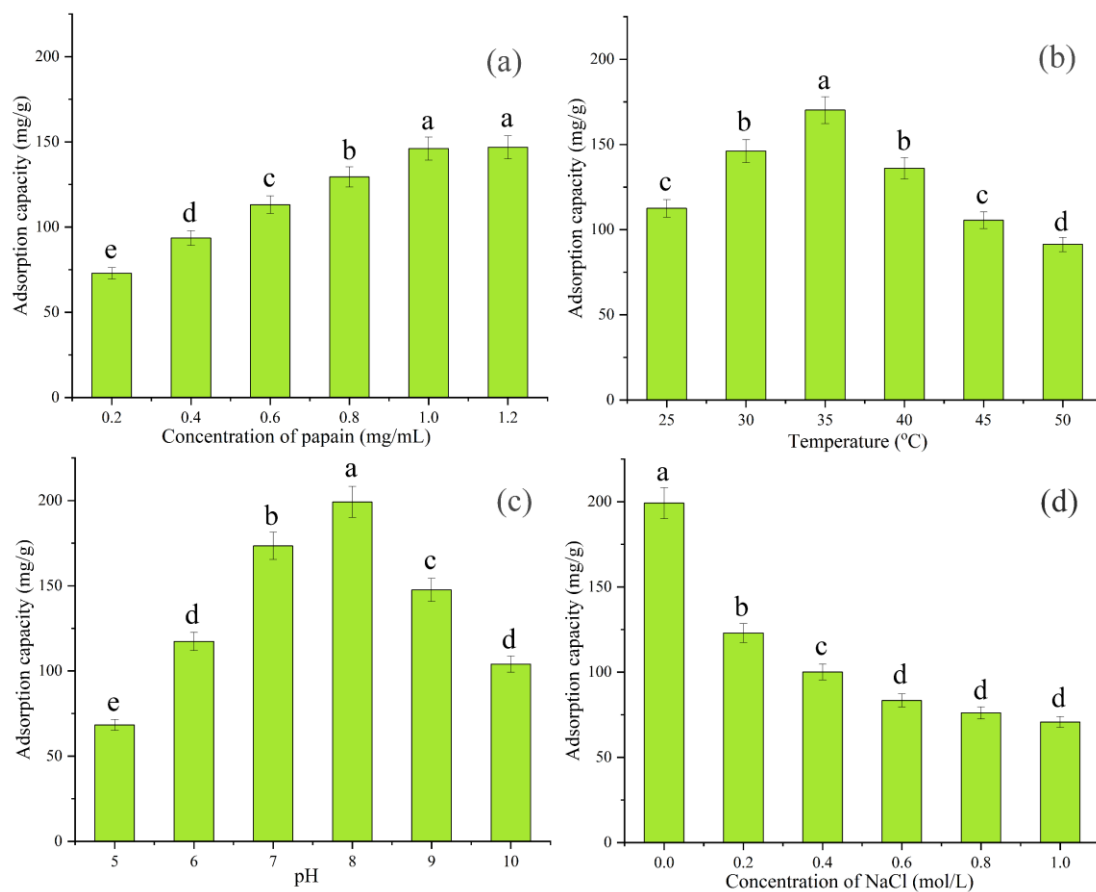

Fig. S2 Effects of the initial concentration of papain (a), temperature (b), pH (c) and concentration of NaCl (d) on the adsorption capacity of papain. Data with different letters show significant difference ( $p < 0.05$ ).

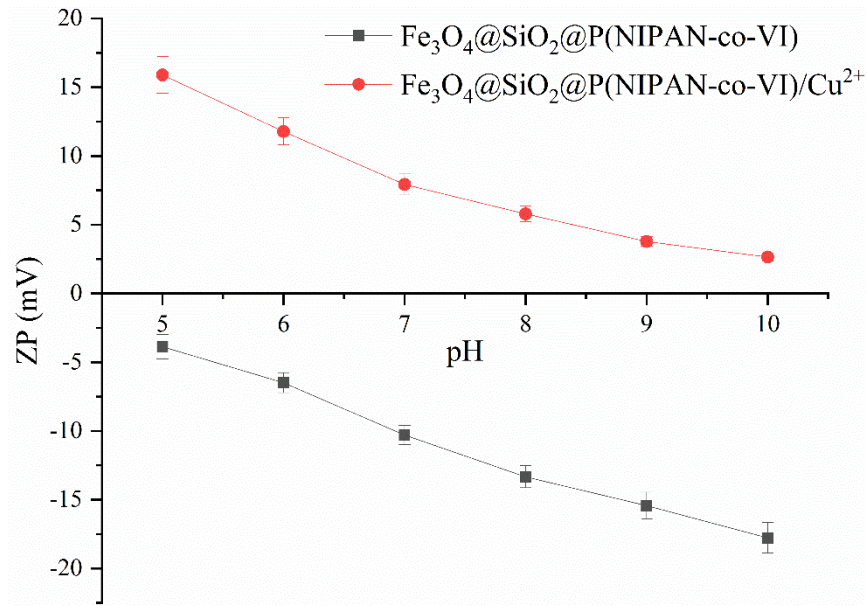

Fig. S3 Zeta-potential of  $\text{Fe}_3\text{O}_4@\text{SiO}_2@\text{P}(\text{NIPAM-co-VI})$  and  $\text{Fe}_3\text{O}_4@\text{SiO}_2@\text{P}(\text{NIPAM-co-VI})/\text{Cu}^{2+}$  at different pH values

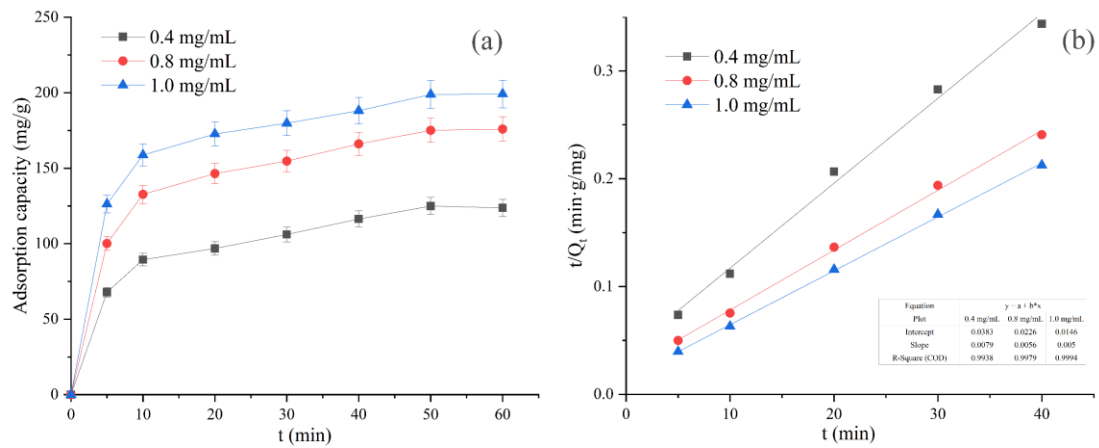

Fig. S4 The adsorption kinetics curves (a) and fitted plots of the pseudo-second order model (b) for the adsorption of papain onto the  $\text{Fe}_3\text{O}_4@\text{SiO}_2@\text{P}(\text{NIPAM-co-VI})/\text{Cu}^{2+}$

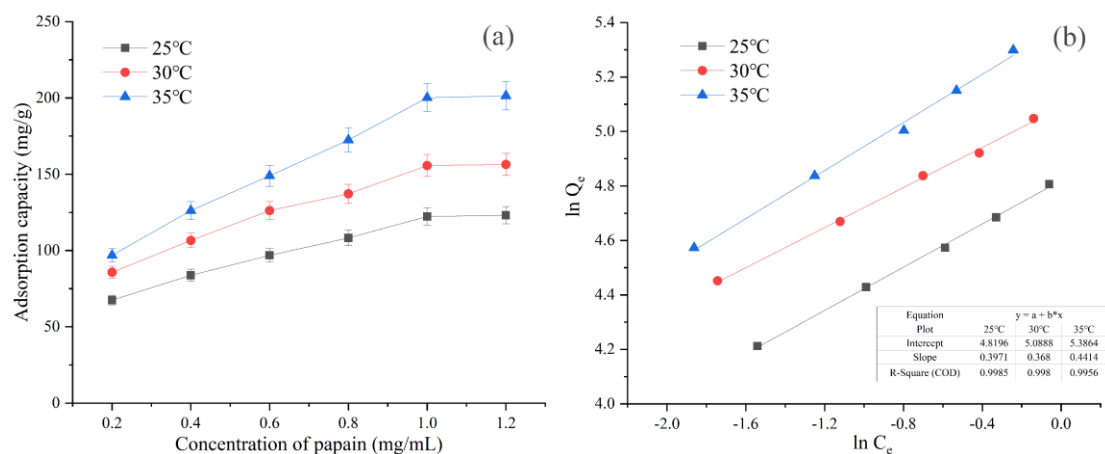

Fig. S5 The adsorption isotherms of papain at 25, 30 and 35°C (a) and the fitted plots of Freundlich equation (b)

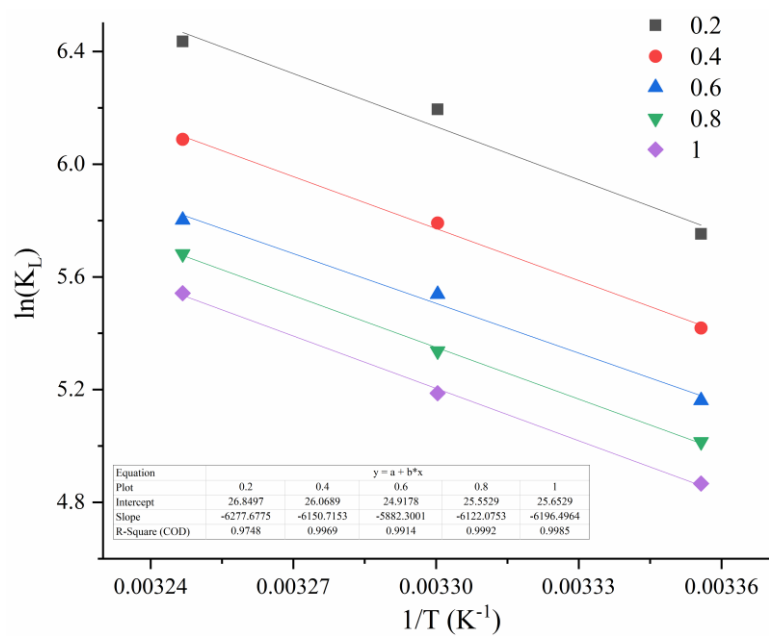

Fig. S6 The fitted plots of  $\ln(K_L)$  to  $1/T$  at different concentration of papain
